# Supplementary material for: In situ TEM analysis of reversible non-180° domain switching in (K,Na)NbO3 single crystals
Source: Royal Society of Chemistry journal article supplement (doi:10.1039/d3ta00737e), 2023-01-01
Supplement: d3ta00737e1.pdf [file d3ta00737e1.pdf]

## Supporting Information

### ***In situ* TEM analysis of reversible non-180° domain switching in (K,Na)NbO<sub>3</sub> single crystals**

Qinwen Guo,<sup>a,b</sup> Chengpeng Hu,<sup>d</sup> Xiangfei Li,<sup>a,b</sup> Ying Meng,<sup>a,c</sup> Luyao Wang,<sup>a,b</sup> Haoyu Zhuang,<sup>a,c</sup> Xi Shen,<sup>\*a</sup> Yuan Yao,<sup>a</sup> Hao Tian,<sup>d</sup> Zhongxiang Zhou,<sup>\*d</sup> and Richeng Yu<sup>\*a,c,e</sup>

<sup>a</sup> Beijing National Laboratory for Condensed Matter Physics, Institute of Physics, Chinese Academy of Sciences, Beijing 100190, China

<sup>b</sup> College of Material Science and Opto-Electronic Technology, University of Chinese Academy of Sciences, Beijing 100190, China

<sup>c</sup> School of Physical Sciences, University of Chinese Academy of Sciences, Beijing 100049, China;

<sup>d</sup> School of Physics, Harbin Institute of Technology, Harbin 150001, P. R. China.

<sup>e</sup> Songshan Lake Materials Laboratory, Dongguan, Guangdong 523808, P. R. China

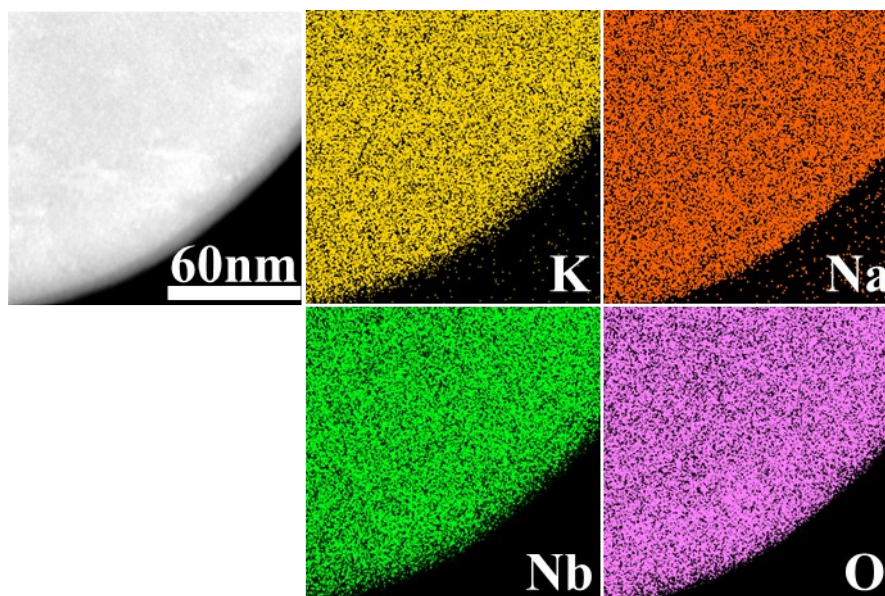

**Figure S1.** ADF-STEM image and corresponding EDS mapping results.

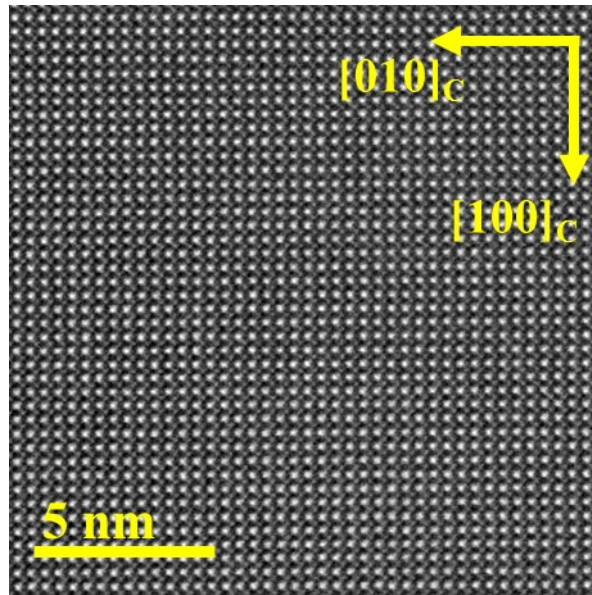

**Figure S2.** High-magnification HAADF-STEM image of KNN single crystal filtered by low pass filter.

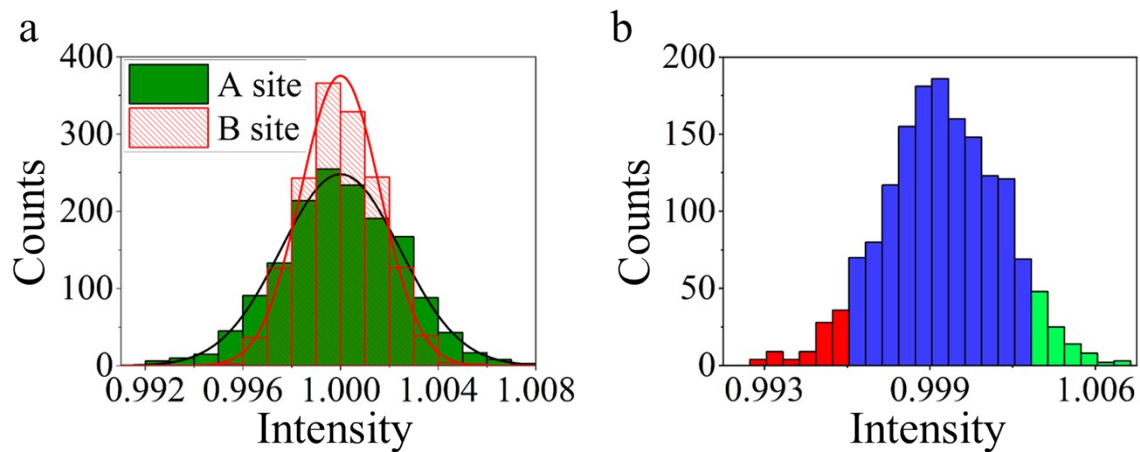

**Figure S3.** Intensity statistics of each atomic column. (a) Comparison between intensity distributions of A site and B site of  $39 \times 39$  atom array in Figure S2, normalized by respective average. The intensity statistics conforms to normal distribution. (b) Intensity statistics of A site. The lower and higher intensities are indicated by red and green, respectively, and the corresponding atomic column positions are shown in Fig. 4b.

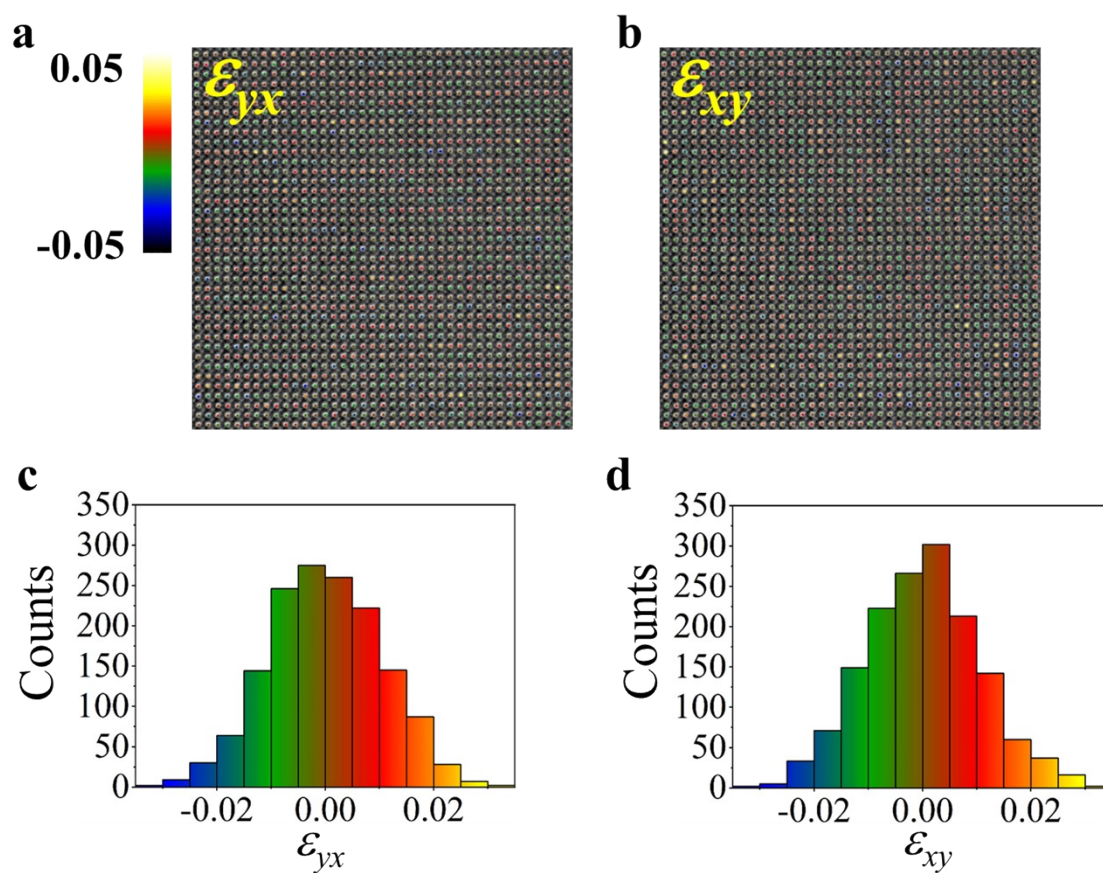

**Figure S4.** Strain maps analyzed with PPA. (a)  $\epsilon_{yx}$ . (b)  $\epsilon_{xy}$ . Colorful spots indicate the magnitude of strain in related unit-cell, while blue and yellow indicate large strains ( $>|\pm 2\%$ ). Strain maps show distinct strain fluctuations. (c, d) Statistics of strains for unit-cells.
